# Supplementary figures and images for: Exploring the Substitution of Exenatide for Insulin in Patients With Type 2 Diabetes Treated With Insulin in Combination With Oral Antidiabetes Agents
Source: Oxford University Press journal article supplement (doi:10.2337/dc06-2532), 2007-10-26

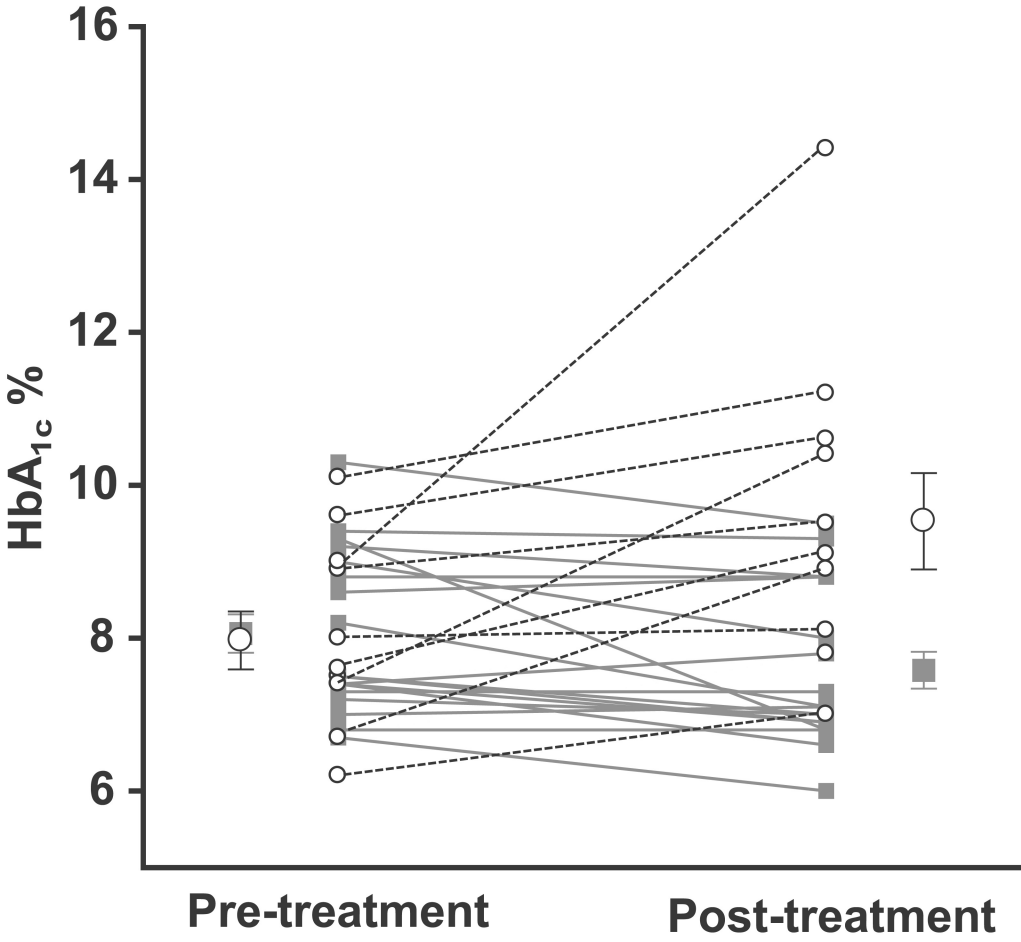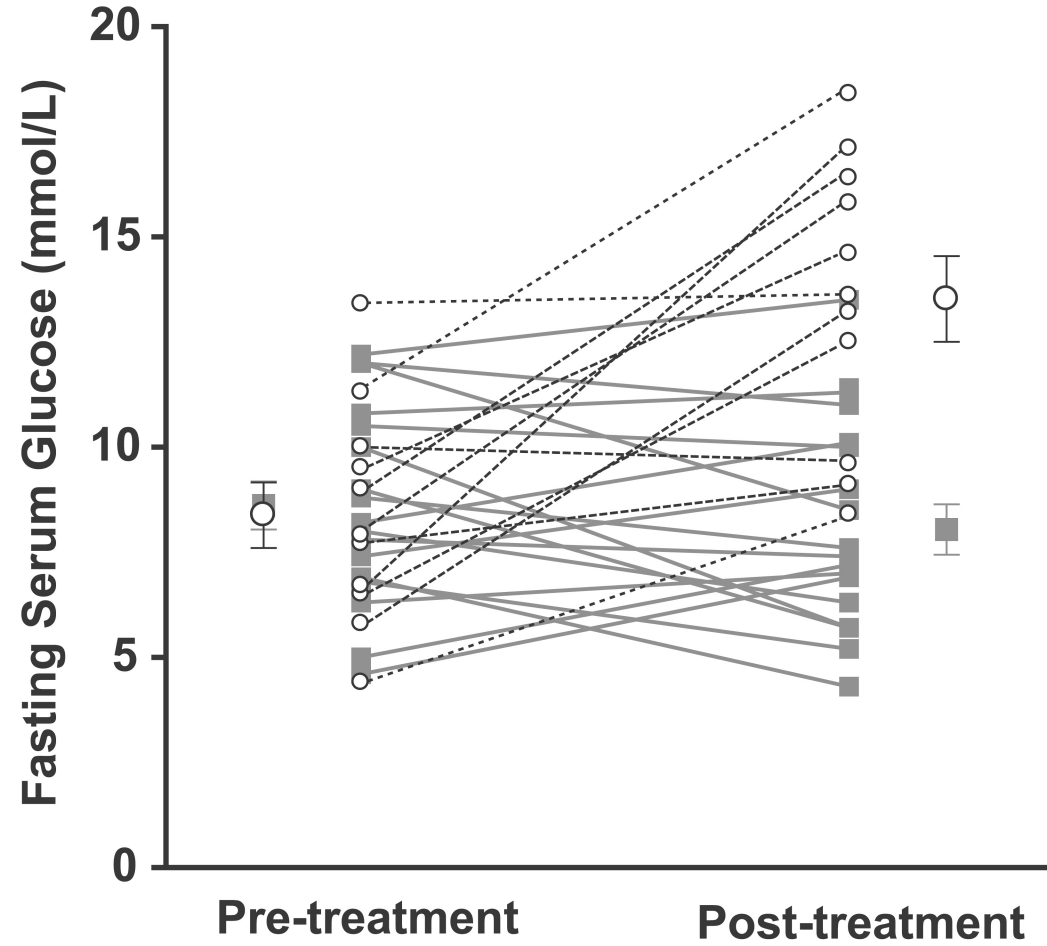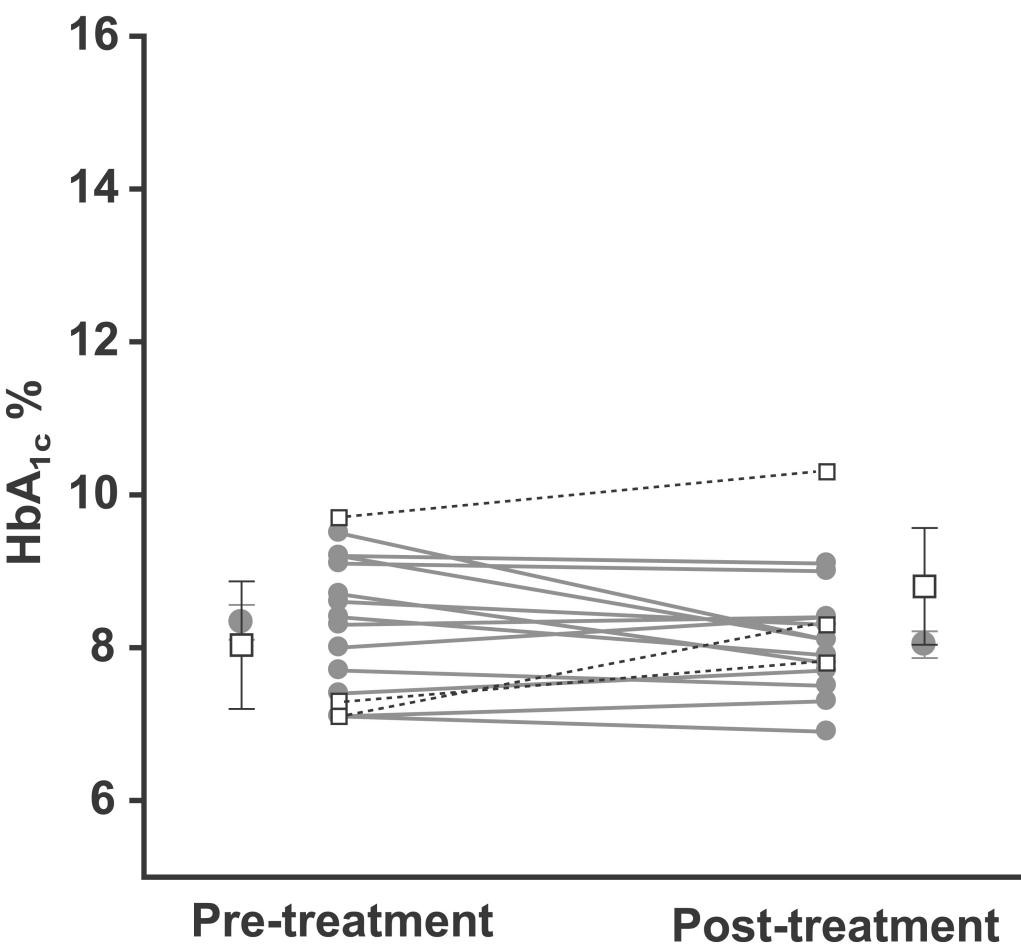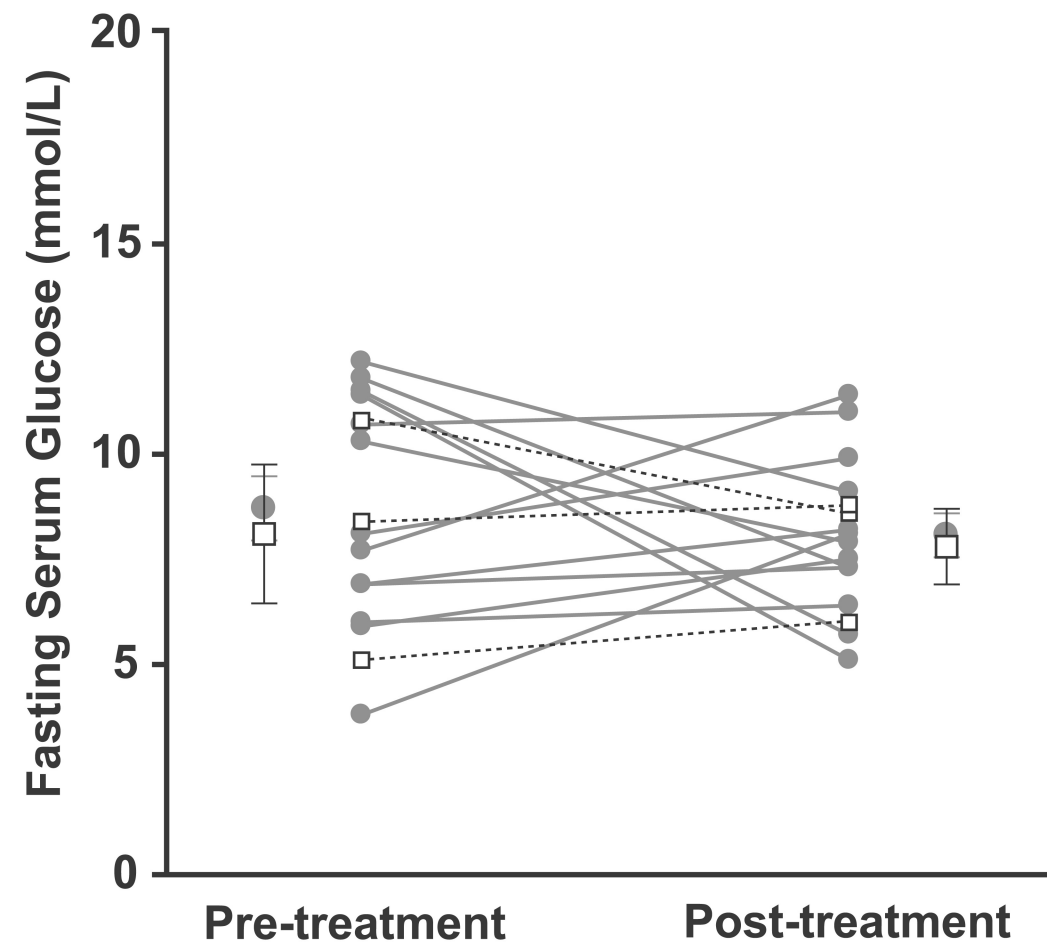

Supplement: dc062532appendix_figure_2.pdf [file dc062532appendix_figure_2.pdf]

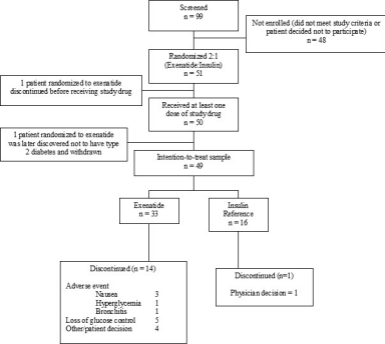

Supplement: dc062532dispositionappendixfigure1.pdf [file dc062532dispositionappendixfigure1.pdf]
